# Supplementary material
Source: HighWire-hosted journal article supplement (https://svn.smart01.highwire.org/content/7/6/518)
Supplement: inline-supplementary-material-1 [file inline-supplementary-material-1.pdf]

## Supplementary Material

### Animals

Monkeys were housed in the \*\*\* indoors individually at a constant temperature of 24°C on a 12-h light/dark cycle by professional breeders. All monkeys were fed twice a day and had free access to clean drinking water. Intravenous 0.9% saline was administered throughout the operation in case of fluids lost. The monkeys were placed on a warm operating table, and a craniotomy was performed from the left frontotemporal pterion. Then the left middle cerebral artery (MCA) was gradually exposed, and the distal M1 branch of MCA was occluded with bipolar electrocoagulation. Penicillin (0.4 million IU, intramuscular, per day) was administered to prevent infection, and tramadol (50-100mg, intramuscular, per day) was administered to relieve pain during the 3 days after the surgery. 25ml of 20% mannitol was administered intravenously daily to relieve cerebral edema, for monkeys with severe consciousness deficits, mannitol was administered twice a day.

### Skeletal Muscle Coordination Assessment

The scale is scored from 0 to 18, where the higher the score the poorer the skeletal muscle coordination and the poorer the motor function. A score of 0 is considered normal walking and a score of 18 shows a complete absence of movement, suggesting a loss of motor function.

### **Primate Rankin Scale (pRS) Score**

The pRS scores include 0-5 points. 0 points indicated no symptoms, 1 point indicated no significant disability, 2 points indicated slight disability, 3 points indicate moderate disability, 4 points indicate moderately severe disability, and 5 points indicated severe disability or death.

### **Behavior Assessment**

Hill Task unit consists of two staircases each with 5 compartments in the forward direction, while the staircases in the Valley Task unit are in the reverse direction. A small piece of carrot or apple, about  $14 \times 14 \times 14$  mm in size, was placed on each staircase. The monkeys were allowed to retrieve all the food within 5 minutes and the time spent retrieving each side of the stairs was recorded by observers. Only successful retrieval of food through the square holes on both sides of the Hill Task device or through the round hole in the middle of the Valley Task device using the correct hand was recorded. If the monkey could not successfully retrieve the food after several attempts for a total time of more than 5 minutes, the time was recorded for that side of the hand as three times the average of the corresponding hand before surgery.

### **MEP Amplitude and Latency**

The relationship between stimulus intensity and MEP amplitude is in

46 the form of an S-shaped curve, generally referred to as the  
47 “stimulus-response curve” or “recruitment curve”.<sup>1</sup> The initial segment  
48 of this curve was relatively flat, with a near-linear increase in MEP  
49 amplitude at stimulus intensities between 120% and 140% of RMT, while  
50 at higher stimulus intensities the curve approached a plateau, at which  
51 point the MEP amplitude did not increase further even when the stimulus  
52 intensity was increased. In many studies, only a single intensity MEP was  
53 assessed due to experimental limitations, rather than assessing the entire  
54 stimulus-response curve. In that case, TMS intensity is usually set to  
55 115%-125% of the individual RMT to ensure that the experiment detects  
56 the MEP size in the rising phase of the stimulus-response curve. However,  
57 in clinical diagnosis, the primary goal of TMS-MEP is to elicit the  
58 maximal response of motor cortex. Therefore, the intensity of TMS  
59 should be high enough. In our study MEP with multiple stimulus  
60 intensities was performed. According to the International Federation of  
61 Clinical Neurophysiology guidelines, TMS stimulation intensity is  
62 usually expressed as a single motor threshold or as a percentage of the  
63 maximum stimulator output (MSO).<sup>1</sup> The stimulus intensity was  
64 gradually increased from RMT until the MEP no longer increased, at  
65 which point the maximum MEP amplitude was obtained. In the  
66 TMS-MEP on motor cortex, the range of stimulus intensities where  
67 maximum MEP amplitude was between 60% MSO and 80% MSO in our

68 experiment. Thus, the magnetic stimulation output was set to 60-80%  
69 MSO to obtain the stable and maximum MEP amplitude. It is known that  
70 the variability of the MEP amplitude excited by 100% RMT TMS was  
71 small when the muscle was completely relaxed, generally 0-0.5mV in  
72 absolute value.<sup>1</sup> Therefore, the maximum amplitude in the pre-stimulation  
73 period generally did not exceed 0.5mV in absolute value when excited by  
74 100% RMT. In general, the muscles in sedated monkeys were presumed  
75 to be relaxed, yet further confirmation by electromyography would have  
76 been preferable. Since electromyography could not be performed due to  
77 the instrumentation limitations, no pre-stimulus muscle activities were  
78 confirmed by baseline mean amplitude before the stimulation. And it was  
79 possible to judge whether a waveform was an artifact based on the  
80 location, shape, etc. Due to the numerous factors influencing the flatness  
81 of the MEP baseline, slight fluctuations in the baseline have little effect  
82 on the assessment of MEP parameters when the animal's muscles stayed  
83 relaxed.

#### 84 **Animal Sacrifice and Histopathology**

85 Intramuscular ketamine overdoses were given to anesthetize the monkeys  
86 (n=2) at 12 weeks after MCAO. Saline cardiac perfusion was performed  
87 after the pain reflexes had completely disappeared, followed by 4%  
88 paraformaldehyde perfusion. The skin and subcutaneous tissues of both  
89 upper limbs were incised layer by layer, and the bilateral median nerves

were removed and soaked in 4% paraformaldehyde for post-fixation. After 24-48 hours of fixation, dehydration and paraffin embedding were performed and cut into paraffin sections of 3 $\mu$ m thickness. The slices were stained with a HE staining kit (Servicebio, G1003) and a Luxol Fast Blue staining kit (Servicebio, G1030) according to the manufacturer's instructions. Morphological evaluation of the median nerve was performed according to LuxolFastBlue (LFB) staining, and the evaluation criteria were: grade 0: normal; grade 1: structural disorder of nerve fibers; grade 2: obvious vacuole formation; grade 3: disappearance of myelinated nerve fibers.

100

### 101 **Double-labeling Immunofluorescence**

Cross sections (3-  $\mu$  m thick) were cut, and every 20th cross section was selected for fluorescence staining, for a total of 3 sections. Areas where corresponding fluorescence could be detected were defined as regions of interest. A negative control was placed on each section without the adding of the corresponding primary antibody. For double-labeled immunofluorescence staining, paraffin sections were incubated overnight at 4°C with the following primary antibodies after dewaxing to water, antigen repair and blocking steps: rabbit anti- myelin basic protein (MBP; myelin marker, 1:200, Cell Signaling Technology, #78896) and mouse monoclonal anti-neurofilament 200 antibody (NF-200; 1:100, Sigma-Aldrich, N5389). Sections were then incubated with the following

113 fluorescent secondary antibodies for 1 hour at room temperature shielded  
114 from light: Alexa Fluor 555-conjugated goat anti-mouse IgG and Alexa  
115 Fluor 488-conjugated goat anti rabbit IgG (1:200, Cell Signaling  
116 Technology). Fluorescence images were acquired by a Leica DMI8  
117 fluorescence confocal microscope.

118

### 119 **Statistical Analysis**

120 All data were first tested for normal distribution by the Shapiro-Wilk  
121 method. Data that did not meet the normal distribution were analyzed  
122 with the paired Wilcoxon test. Data collected at different time points for  
123 the same indicator that matched the normal distribution, equal variances  
124 and Mauchly's test of sphericity were analyzed with repeated measures  
125 ANOVA. The pRS and SMCS scores at multiple time points were  
126 analyzed by one-way repeated measures ANOVA. MEP parameters  
127 between the affected and unaffected side at multiple time points were  
128 analyzed by two-way repeated measures ANOVA. The MFI data of  
129 bilateral median nerve sections was tested for normality with  
130 Shapiro-Wilk test. Then paired t-test was applied if they met the  
131 normality distribution, otherwise non-parametric test (paired Wilcoxon  
132 test) was conducted. Correlation analysis was performed between the Hill  
133 and Valley Task, pRS and SMCS dataset with parameters of  
134 TMS-MEP/median nerve magnetic stimulation MEP, respectively.  
135 Pearson correlation test was used for data conforming to normal

136 distribution, and non-normal distribution data was analyzed with  
137 Spearman correlation test. The relationships between these datasets were  
138 then explored with automatic linear regression modeling. The Hill and  
139 Valley Task, pRS and SMCS dataset were modeled separately, with  
140 predictors RMT, RMTlat, latency, and amplitude of TMS-MEP and  
141 median nerve MEP.

142

- 143 1. Rossini PM, Burke D, Chen R, et al. Non-invasive electrical and magnetic stimulation of the brain,  
144 spinal cord, roots and peripheral nerves: Basic principles and procedures for routine clinical  
145 and research application. An updated report from an I.F.C.N. Committee. *Clin Neurophysiol*  
146 2015;126(6):1071-107. doi: 10.1016/j.clinph.2015.02.001 [published Online First:  
147 2015/03/24]

148
